# Supplementary material for: Palmitoyl transferases act as potential regulators of tumor-infiltrating immune cells and glioma progression
Source: PubMed Central journal article supplement — Mol Ther Nucleic Acids. 2022 May 4;28:716–31. doi: 10.1016/j.omtn.2022.04.030 (PMC9126852; doi:10.1016/j.omtn.2022.04.030), 2022-05-04
Supplement: mmc1.pdf [file mmc1.pdf]

**OMTN, Volume 28**

**Supplemental information**

**Palmitoyl transferases act as potential  
regulators of tumor-infiltrating immune  
cells and glioma progression**

**Feng Tang, Chao Yang, Feng-Ping Li, Dong-Hu Yu, Zhi-Yong Pan, Ze-Fen Wang, and Zhi-Qiang Li**

# Figure legends

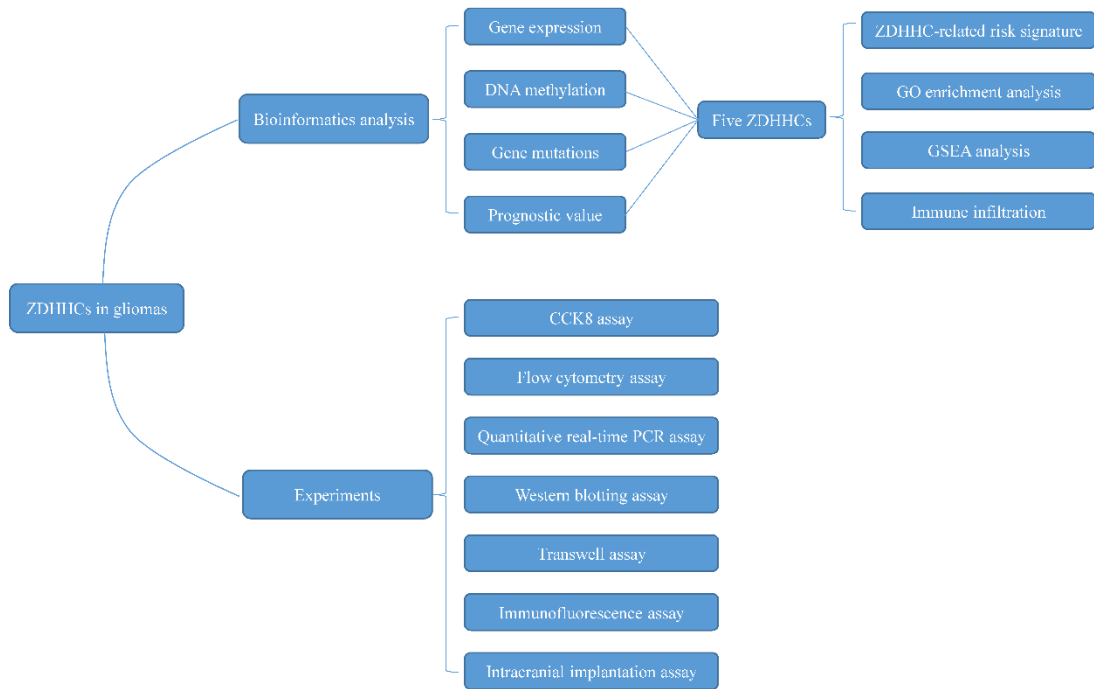

Figure S1

**Figure S1** The summary of what we have done and how we have shown these certain parts of our results.

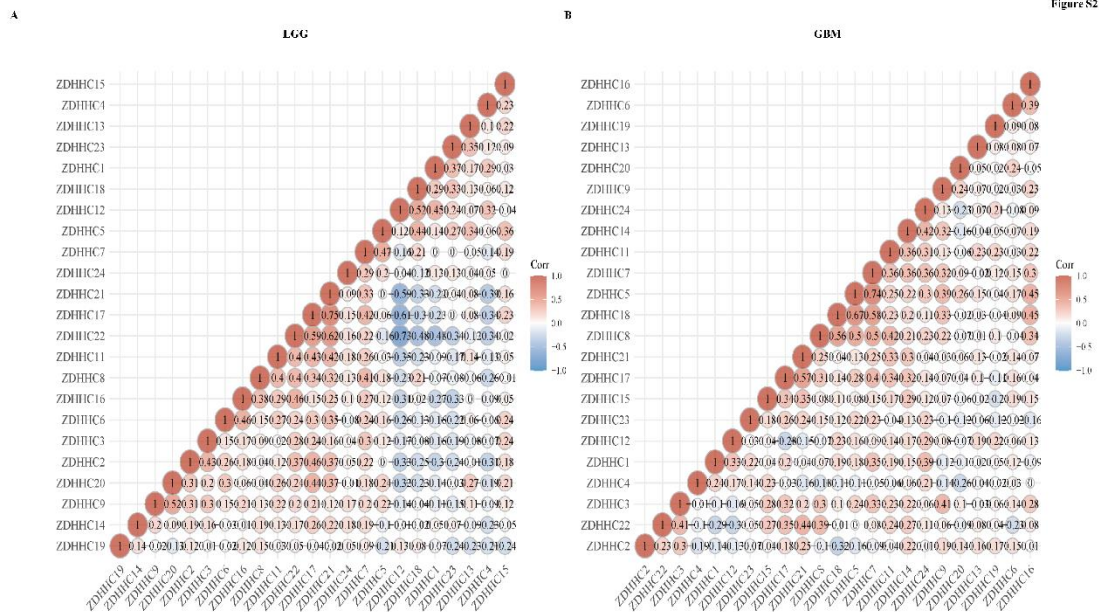

Figure S2

**Figure S2** Pearson correlation among 23 ZDHHC genes in LGGs and GBMs.

Figure S3

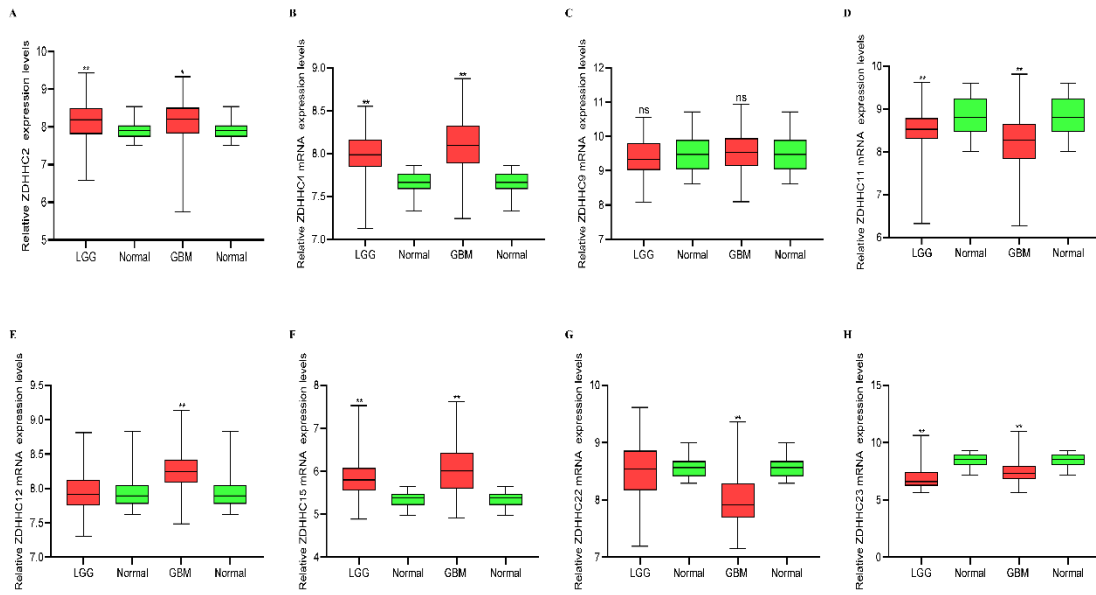

**Figure S3** Relative mRNA expression levels of eight ZDHHCs in the Rembrandt database. \*,  $P < 0.05$ ; \*\*,  $P < 0.01$  compared with normal brain tissues.

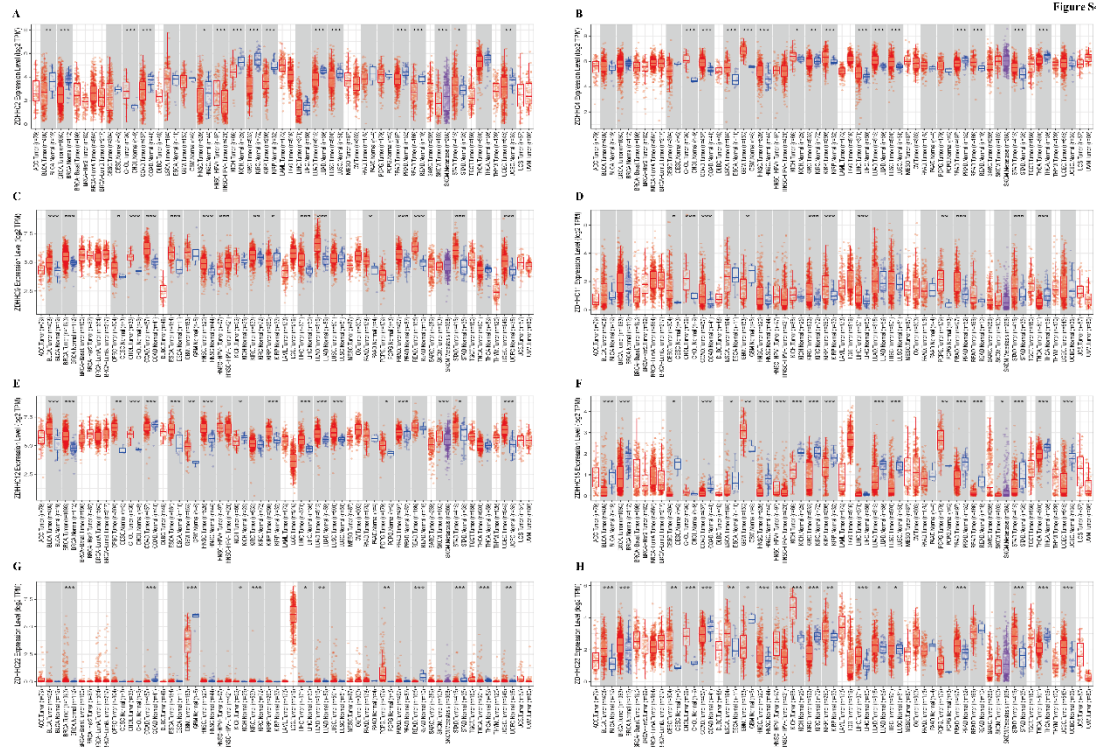

Figure S4

**Figure S4** Relative mRNA expression levels of eight ZDHHCs in all tumor types. \*,  $P < 0.05$ ; \*\*,  $P < 0.01$ ; \*\*\*,  $P < 0.001$  compared with corresponding normal tissues.

Figure S5

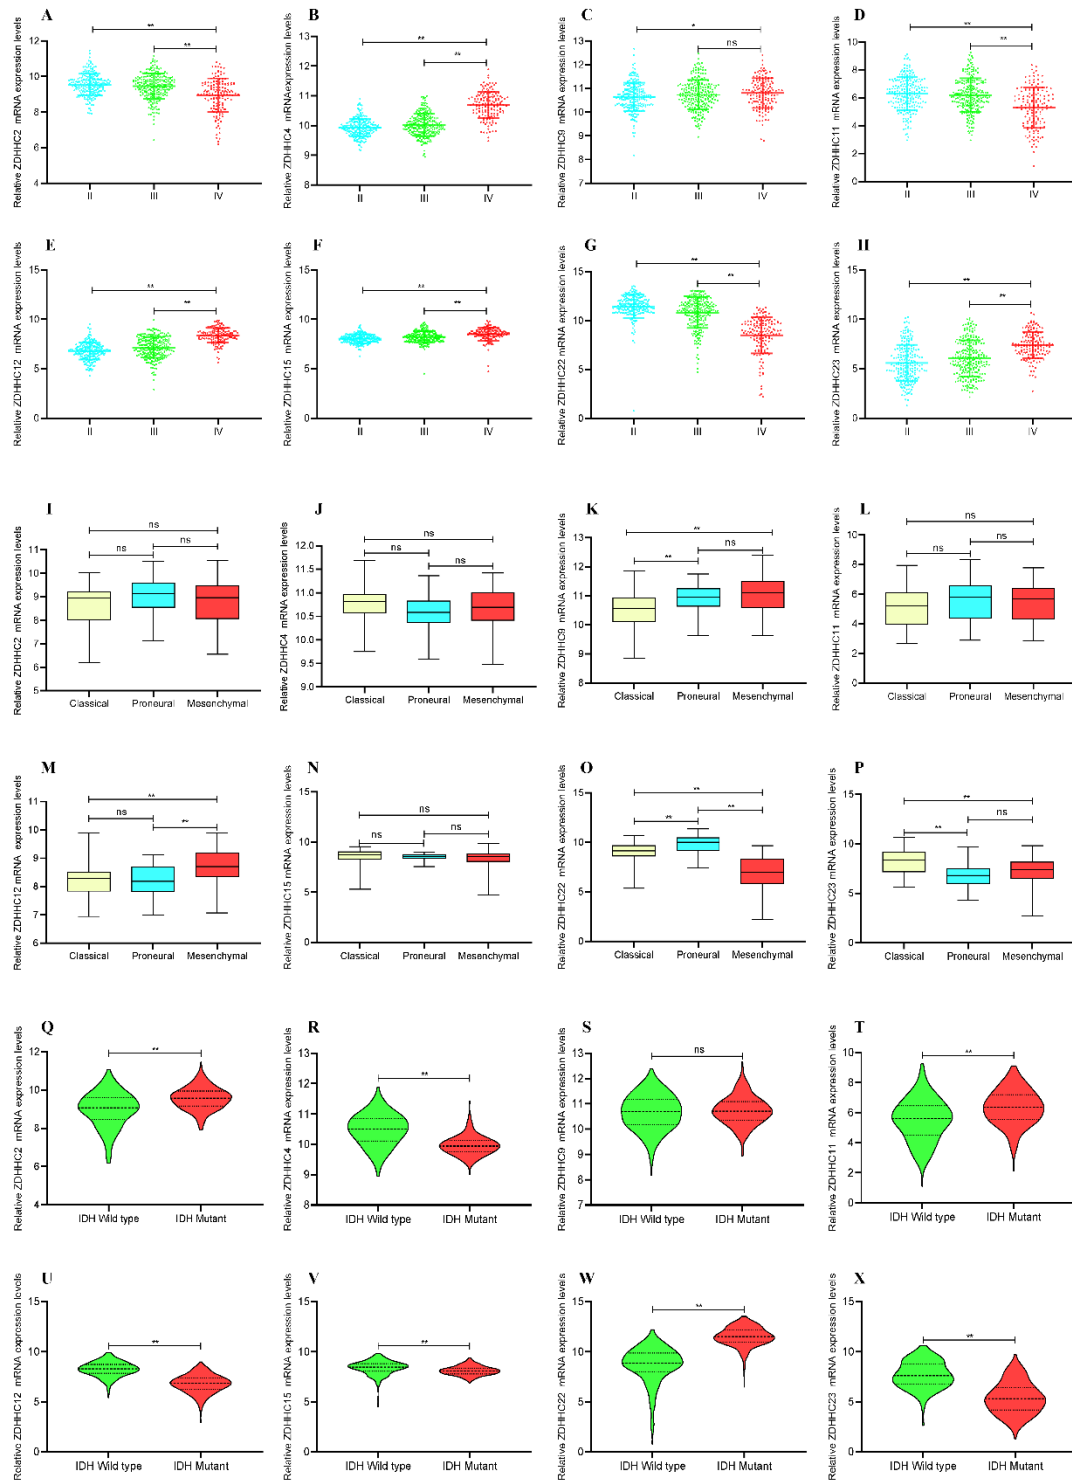

**Figure S5** Correlation of eight ZDHHCs among tumor grade, molecular types, and IDH mutant status. A-H. Correlation of eight ZDHHCs and tumor grade. \*,  $P < 0.05$ ; \*\*,  $P < 0.01$ ; ns,  $P > 0.05$  compared with grade IV. I-P. Correlation of eight ZDHHCs and

molecular types. \*\*,  $P < 0.01$ ; ns,  $P > 0.05$  compared with classical. Q-X Correlation of eight ZDHHCs and IDH mutant status. \*\*,  $P < 0.01$ ; ns,  $P > 0.05$  compared with IDH wild type.

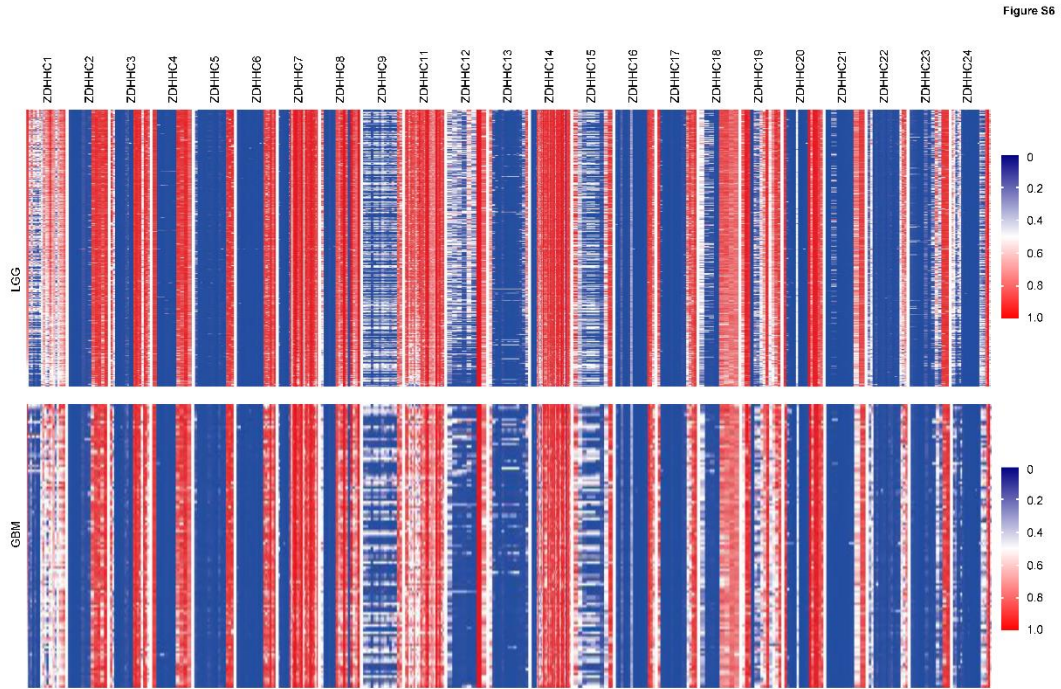

**Figure S6** Methylation levels of ZDHHC genes in gliomas.

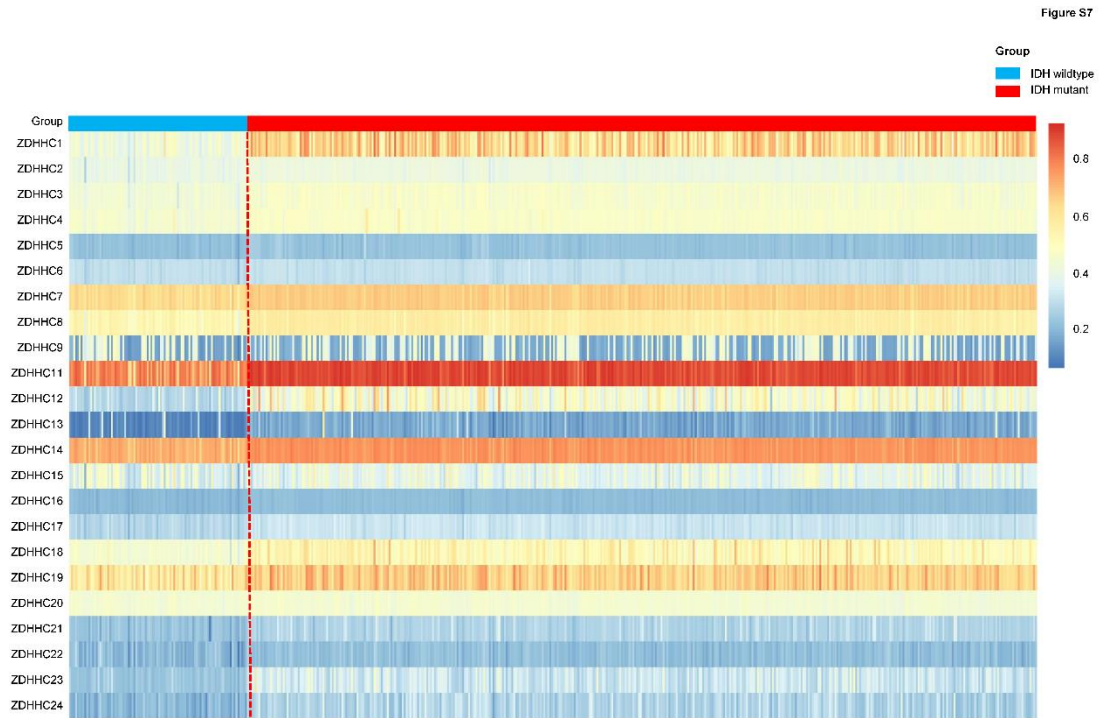

**Figure S7** The difference of methylation levels of ZDHHC genes between IDH wild-

type and mutant gliomas.

Figure S8

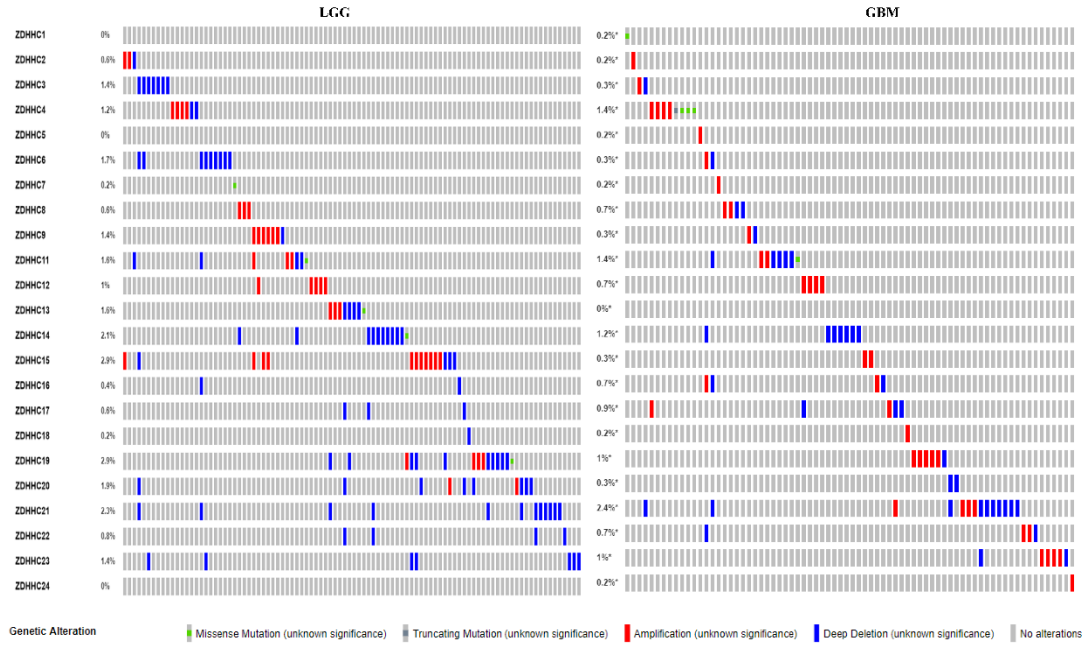

**Figure S8** Oncoprint visualization of genomic alterations of ZDHHCs in LGGs and GBMs.

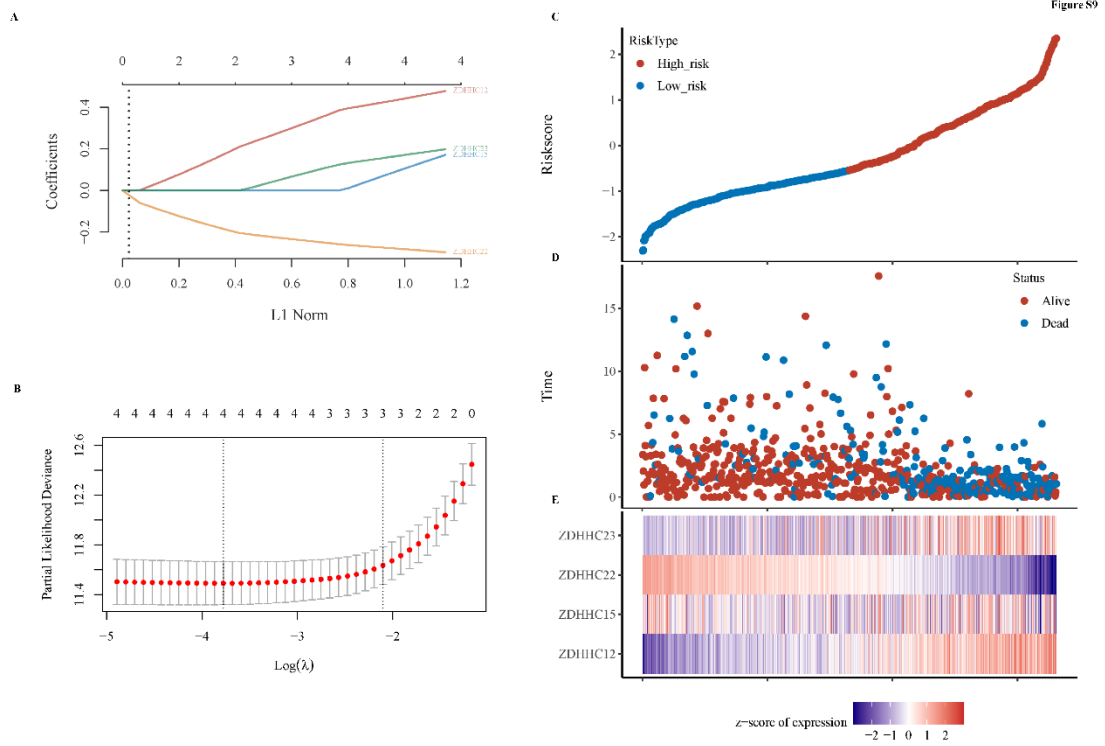

**Figure S9** Lasso regression model was conducted to identify the most significant

survival-associated ZDHHCs in gliomas.

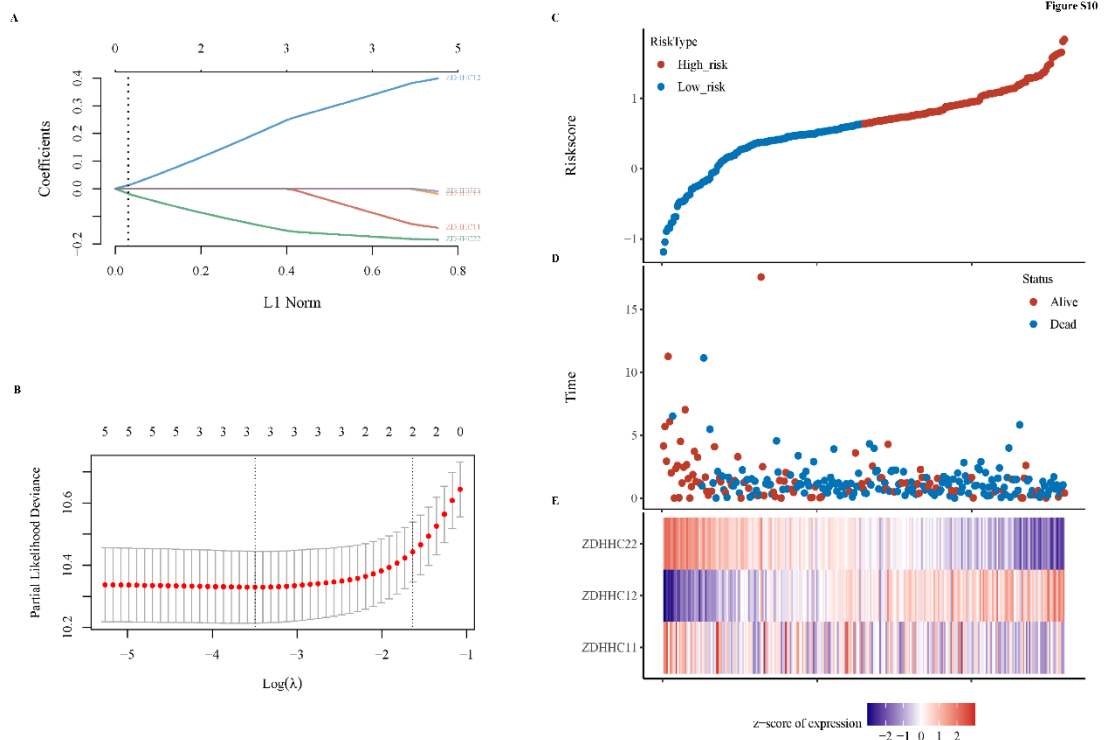

**Figure S10** Lasso regression model was conducted to identify the most significant survival-associated ZDHHCs in IDH wild-type gliomas.

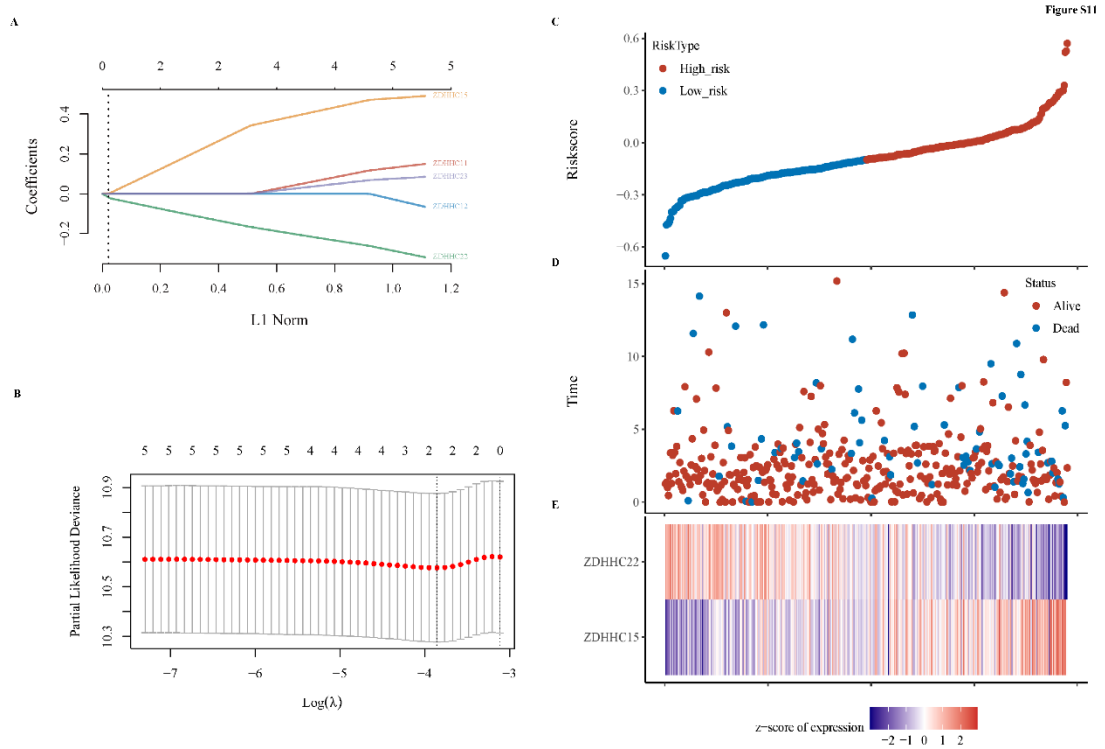

**Figure S11** Lasso regression model was conducted to identify the most significant survival-associated ZDHHCs in IDH mutant gliomas.

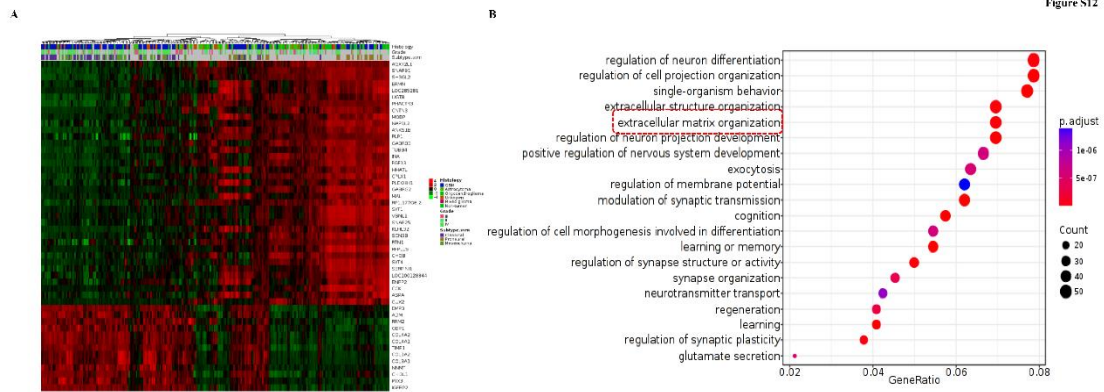

**Figure S12** GO enrichment analysis of ZDHHC11 in gliomas. A. The top-50 genes related to ZDHHC11 expression. B. The top-10 GO terms in the ZDHHC11-associated biological processes.

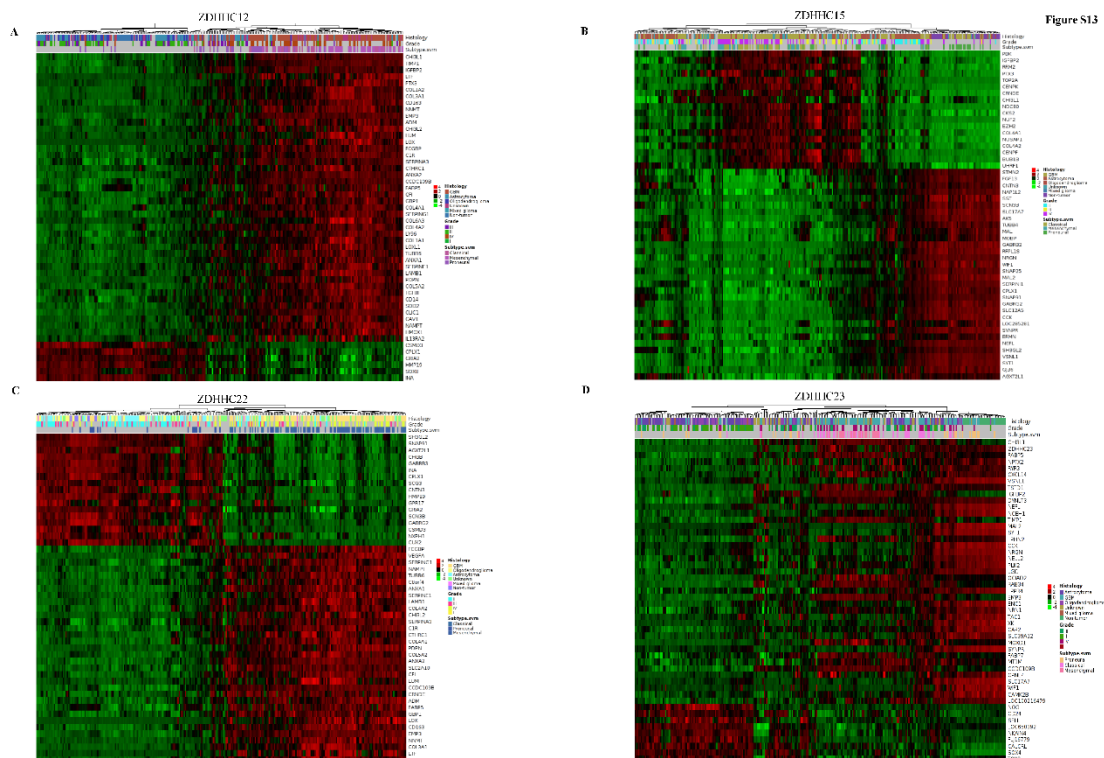

**Figure S13** The top-50 genes related to ZDHHC12, 15, 22, 23 expression, respectively.



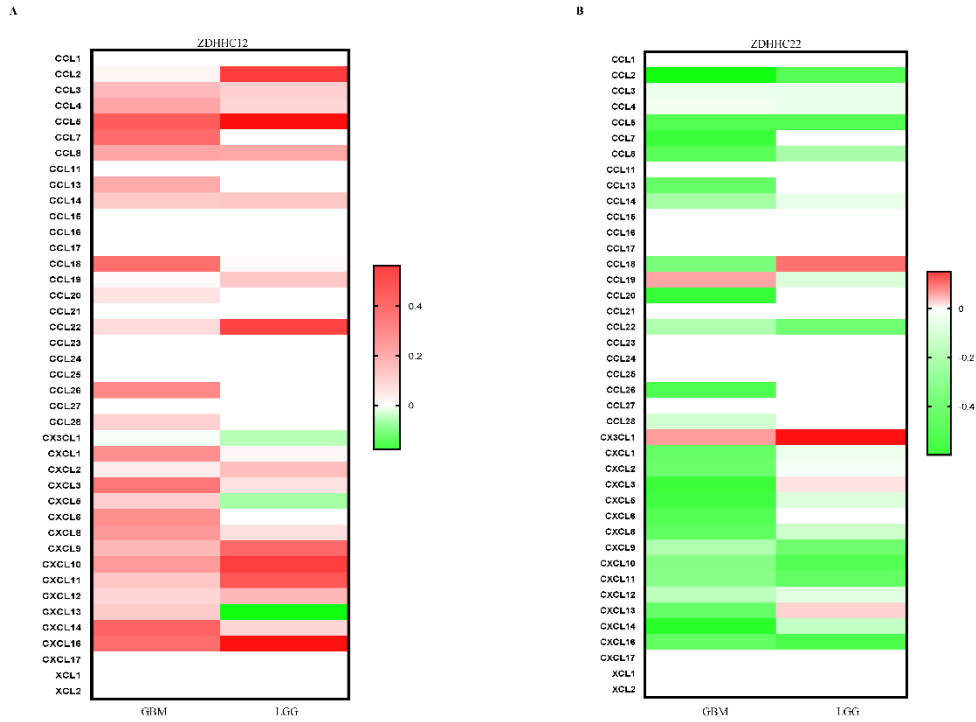

**Figure S14** Correlation of ZDHHCs and chemokines. A. Relationship between ZDHHC12 expression and levels of chemokines. B. Relationship between ZDHHC22 expression and levels of chemokines.

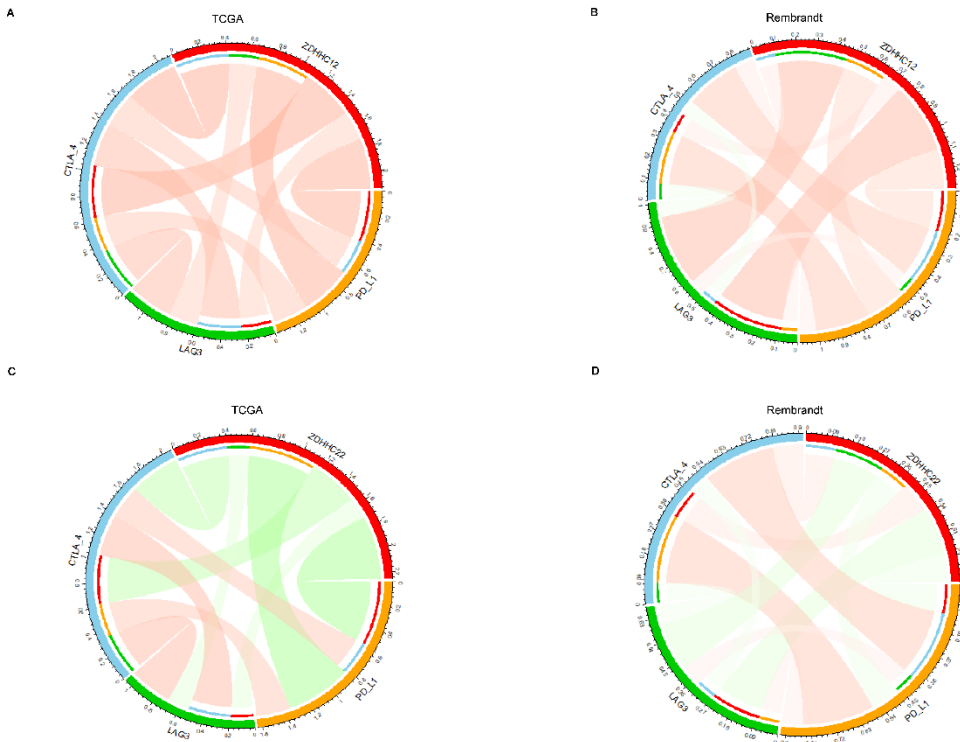

**Figure S15** Correlation of ZDHHCs and immune check points. A-B. Relationship between ZDHHC12 expression and immune check points expression in both TCGA and Rembrandt database. C-D. Relationship between ZDHHC22 expression and immune check points expression in both TCGA and Rembrandt database.

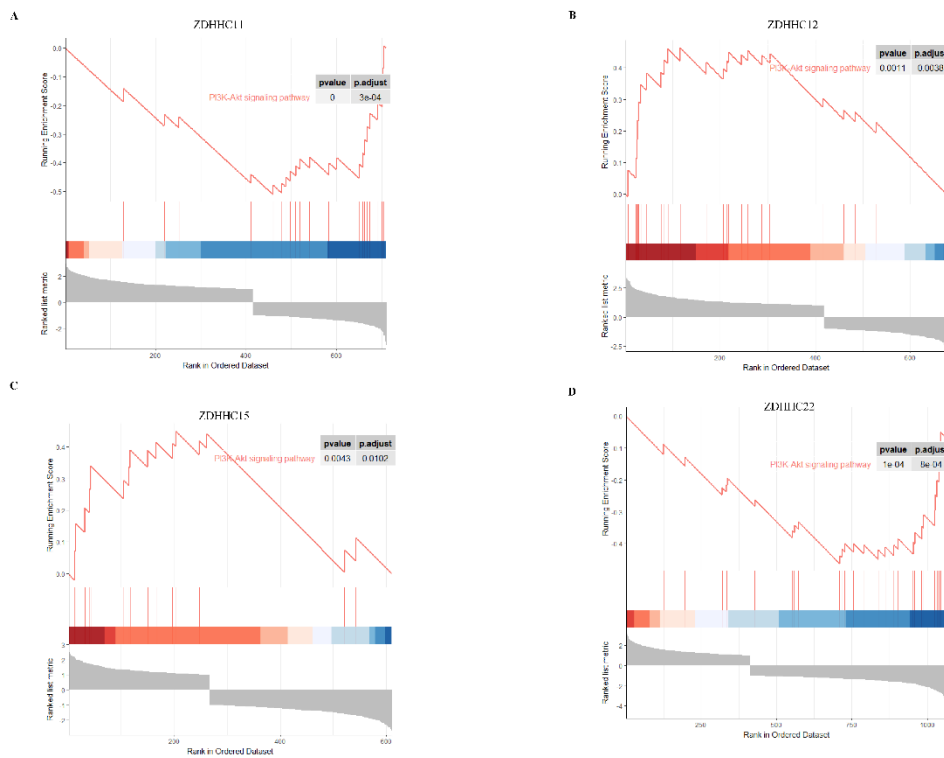

Figure S16

**Figure S16** GSEA analysis of ZDHHCs in gliomas. A–D. ZDHHC11, ZDHHC12, ZDHHC15, and ZDHHC22 are involved in the PI3K/AKT signaling pathway.

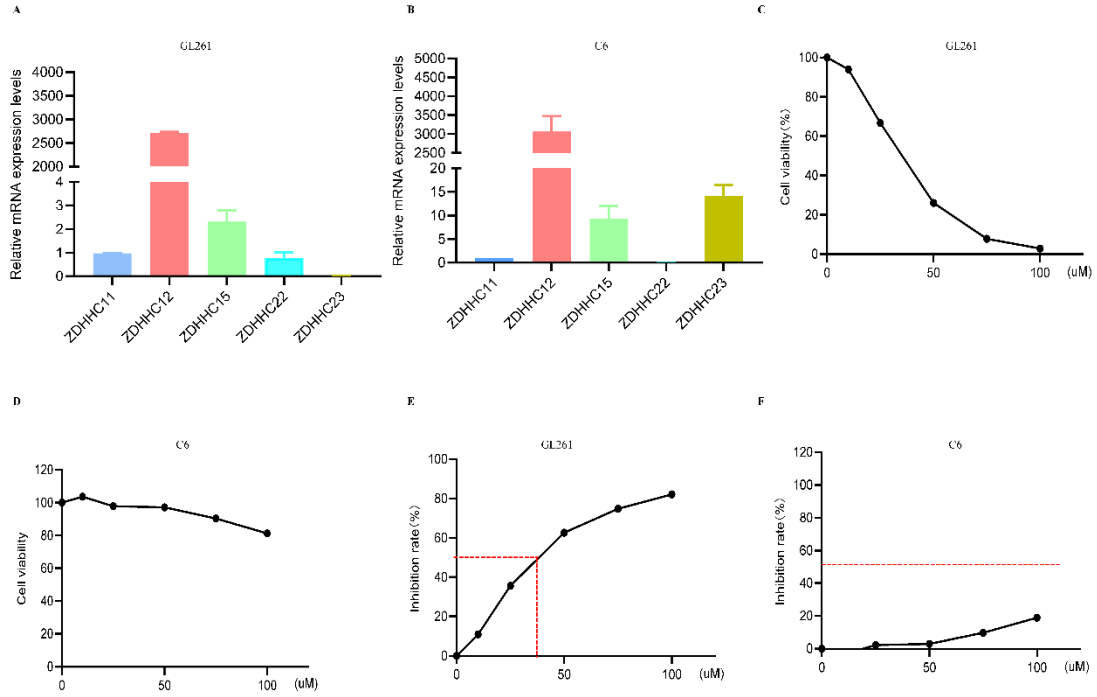

**Figure S17** Relative ZDHHCs expression and  $IC_{50}$  values of 2-BP in glioma cells. A-B Relative ZDHHCs expression in GL261 and C6 cell lines. C-F. Effects of different concentrations of 2-BP on glioma cell viability, and corresponding  $IC_{50}$  values of glioma cells.

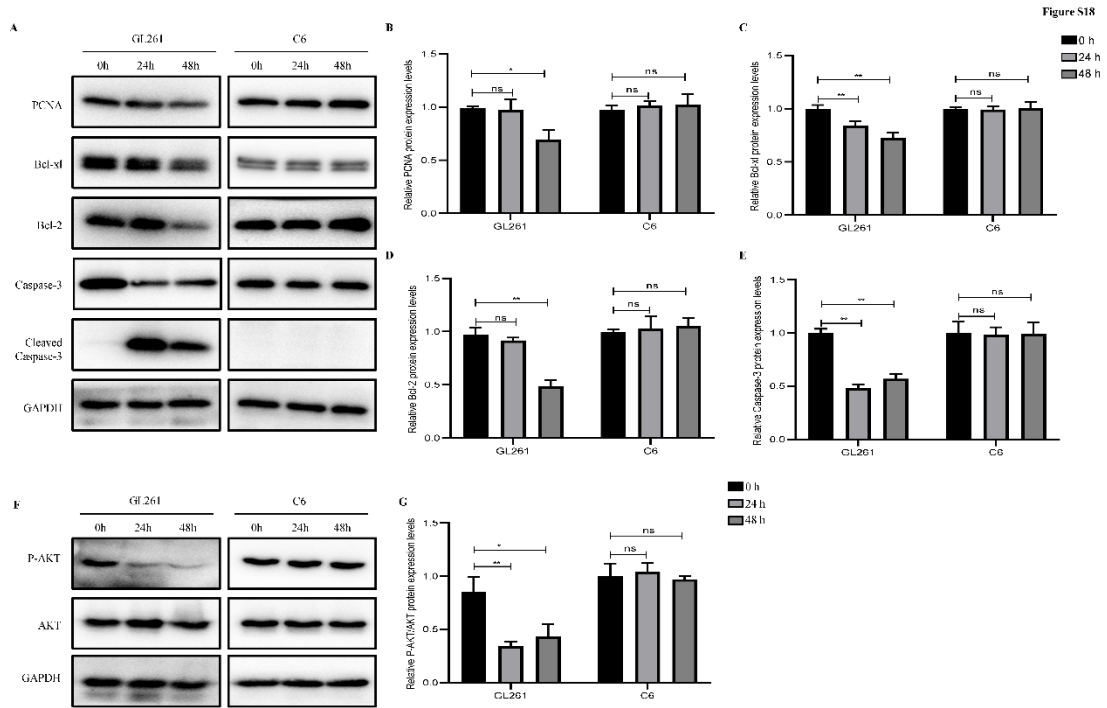

**Figure S18** Effects of 2-BP on related proteins levels in gliomas. A-E. Effects of 2-BP on proliferation and apoptosis-related proteins levels in glioma cell lines. \*,  $P < 0.05$ ; \*\*,  $P < 0.01$ ; ns,  $P > 0.05$  compared with control. F-G. Effects of 2-BP on PI3K/AKT signaling pathway-related proteins levels in glioma cell lines. \*,  $P < 0.05$ ; \*\*,  $P < 0.01$ ; ns,  $P > 0.05$  compared with control.

Figure S19

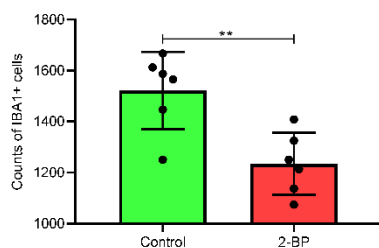

**Figure S19** Effects of 2-BP on microglia infiltration. \*\*,  $P < 0.01$ ; compared with control.

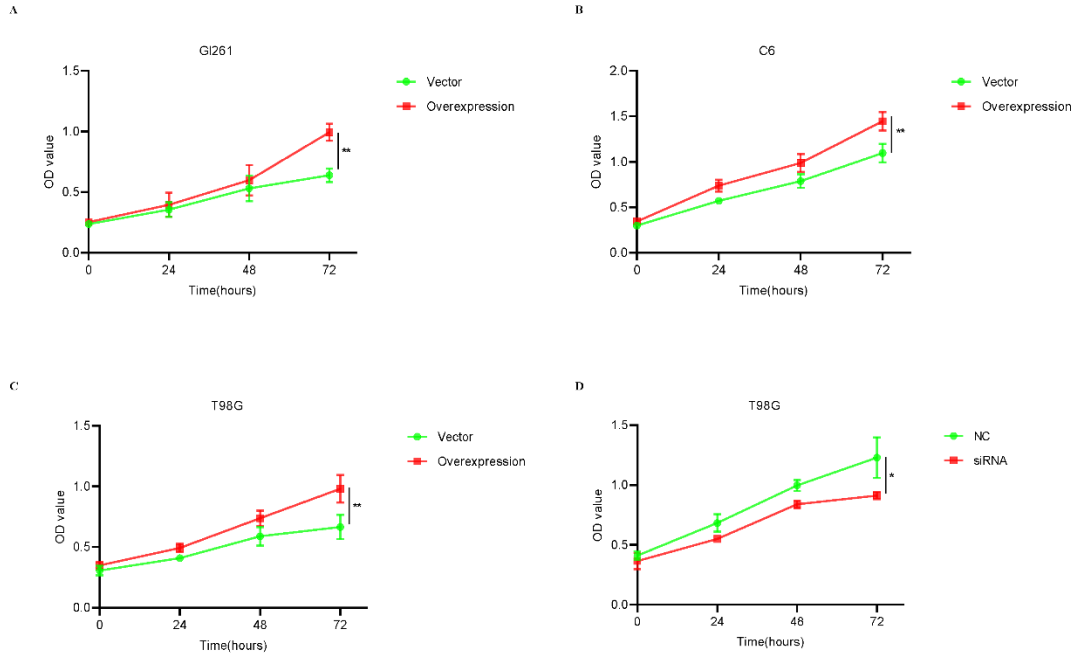

**Figure S20** Effects of overexpression or knockdown of ZDHHC12 on cell viability. A-C GL261, C6 and T98G cell were transfected with ZDHHC12 overexpressed plasmids and then cell viability was measured. \*\*,  $P < 0.01$  compared with vector. D. T98G cells was knockout of ZDHHC12 and then cell viability was measured. \*,  $P < 0.05$  compared with NC.
